# Supplementary material for: Rational design of conductive metal–organic frameworks and aligned carbon nanofibers for enhancing the performance of flexible supercapacitors
Source: Royal Society of Chemistry journal article supplement (doi:10.1039/d3na00695f), 2024-01-01
Supplement: d3na00695f1.pdf [file d3na00695f1.pdf]

## Supporting Information

### **Rational Design of Conductive Metal–Organic Frameworks and Aligned Carbon Nanofibers for Enhancing the Performance of Flexible Supercapacitors**

Dongyeon Kim,<sup>a,b,†</sup> Tae Gwang Yun,<sup>c,†</sup> Ji Hyun Lee,<sup>b,d,†</sup> Ki Ro Yoon,<sup>b,\*</sup> and Kyunghoon Kim<sup>a,\*</sup>

<sup>a</sup>School of Mechanical Engineering, Sungkyunkwan University, Suwon 16419, Republic of Korea

<sup>b</sup>Advanced Textile R&D Department, Korea Institute of Industrial Technology (KITECH), 143, Hangeulro, Sangnok-gu, Ansan-si, Gyeonggi-do, 15588, Republic of Korea

<sup>c</sup>Department of Materials Science and Engineering, Myongji University, Yongin, Gyeonggi 17058, Republic of Korea

<sup>d</sup>Division of Materials of Science and Engineering, Hanyang University, 222 Wangsimni-ro, Seongdong-gu, Seoul 04763, Republic of Korea

\* e-mail : kryoon@kitech.re.kr, kenkim@skku.edu

† These authors contributed equally.

**a**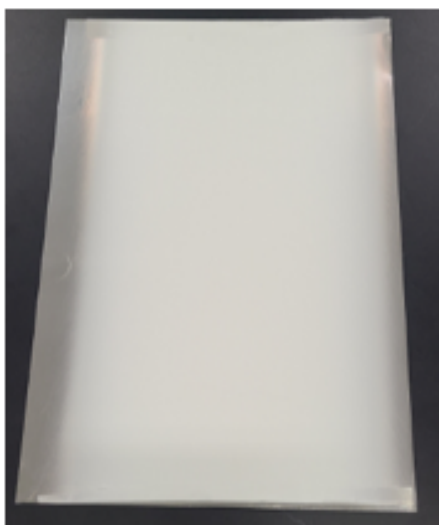**b**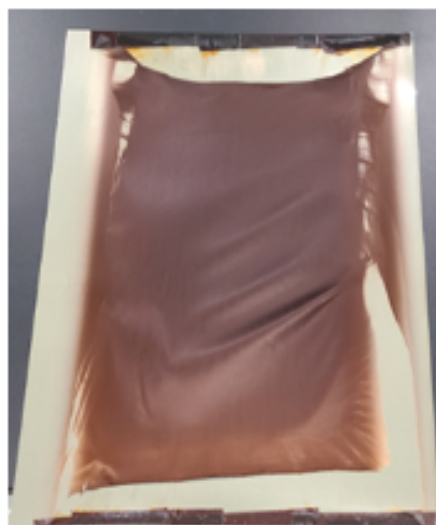**c**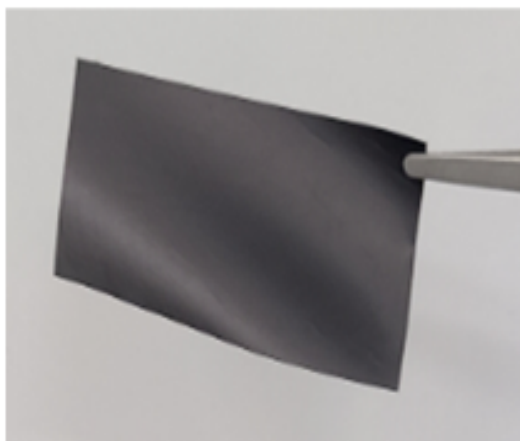

**Figure S1.** Optical images of (a) aligned PAN nanofibers, (b) aligned oxidized PAN nanofibers and (c) aligned carbon nanofibers (ACNF).

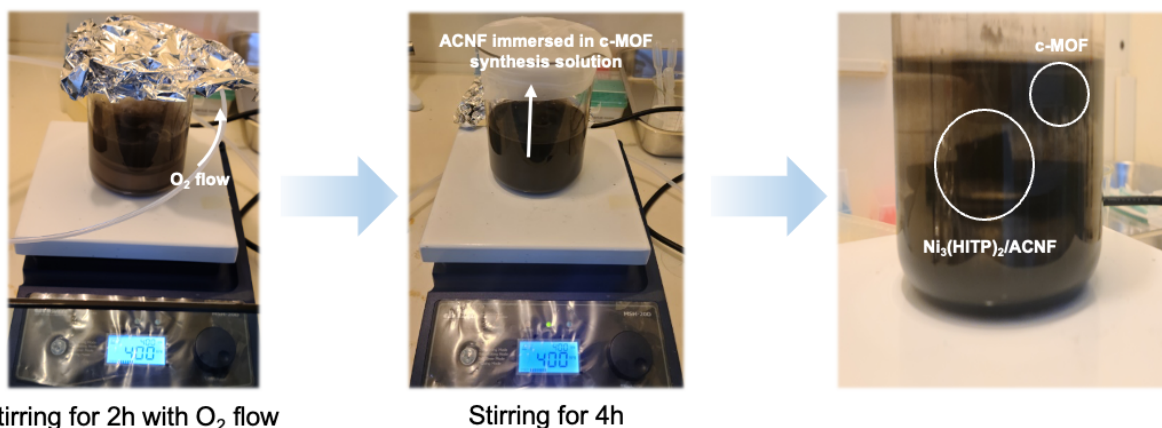

**Figure S2.** In-situ synthesis process of c-MOF onto the surface of ACNF.

**a**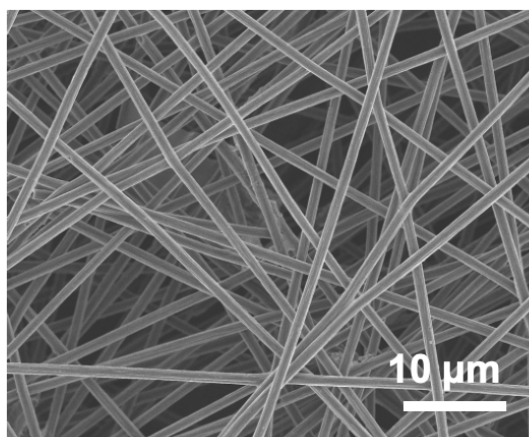**b**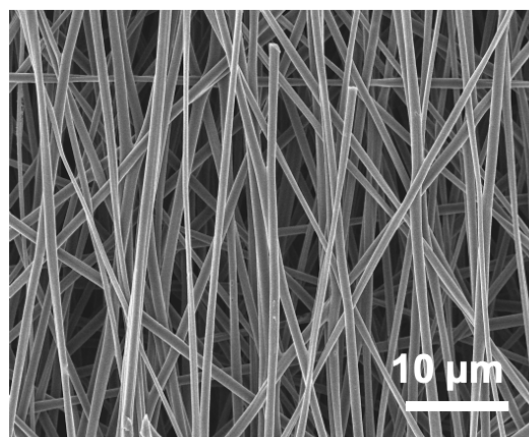

**Figure S3.** Low magnification SEM image of (a) RCNFs and (b) ACNFs.

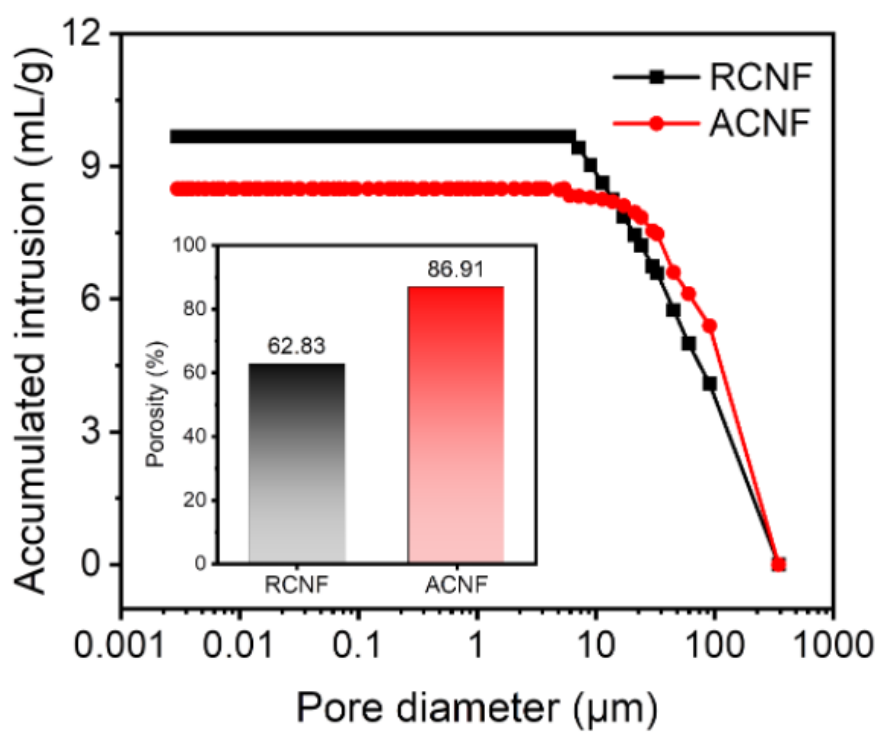

**Figure S4.** Accumulated mercury intrusion of RCNF and ACNF using mercury intrusion porosimetry (inset: porosity values).

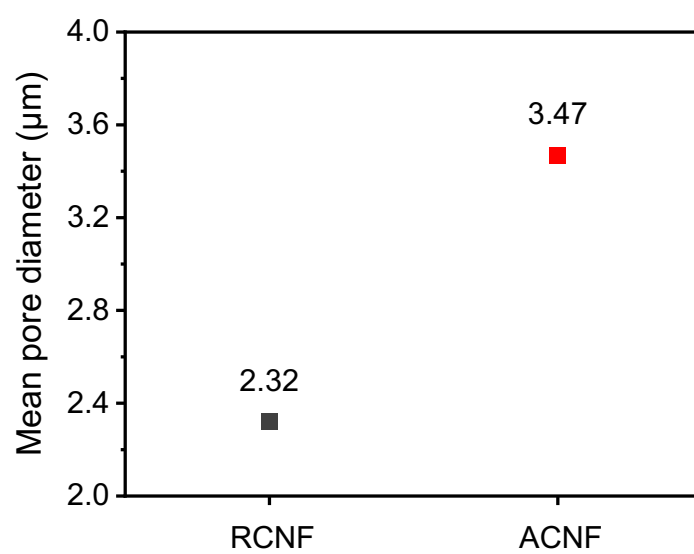

**Figure S5.** Mean pore diameter of RCNF and ACNF measured by a capillary flow porometer.

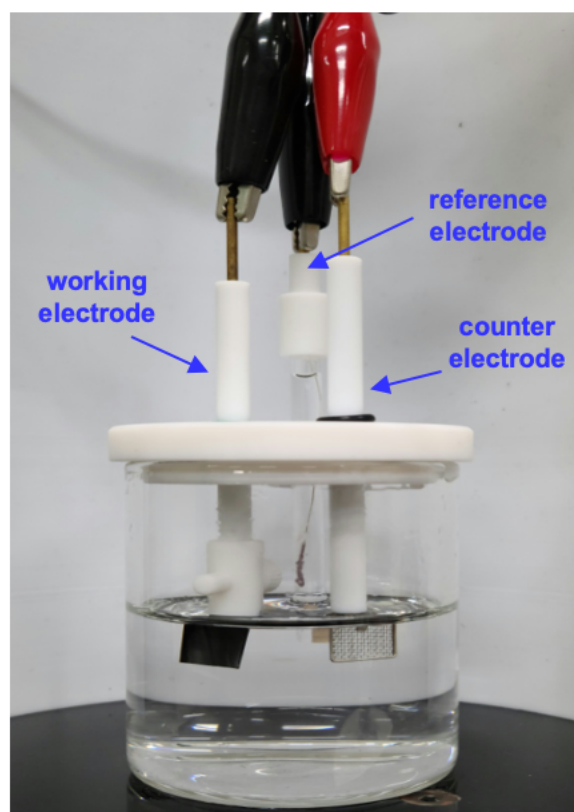

**Figure S6.** The three electrode setup in 3 M KCl electrolyte.

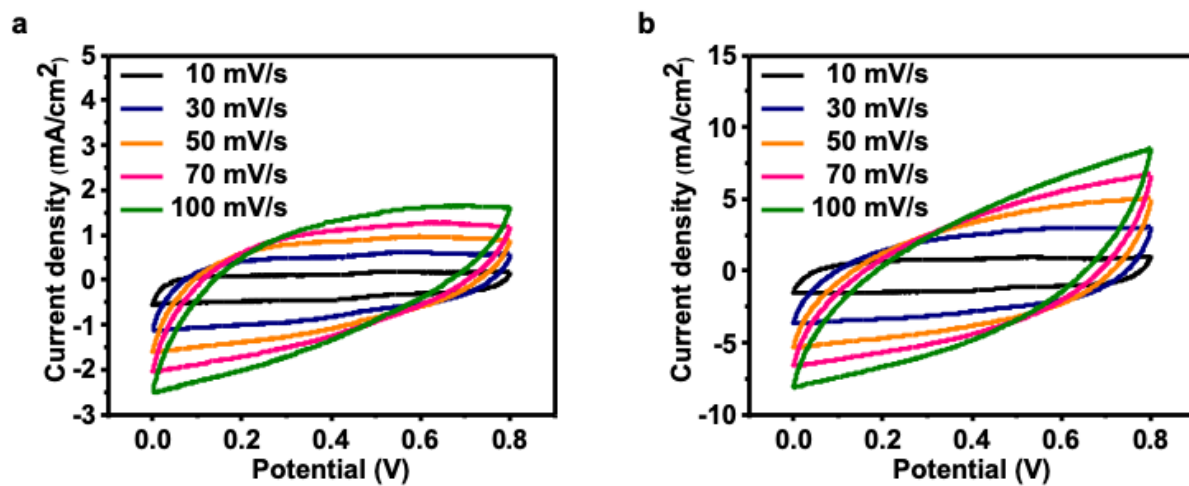

**Figure S7.** Cyclic voltammetry (CV) curves of (a) RCNF (b) ACNF at various scan rates.

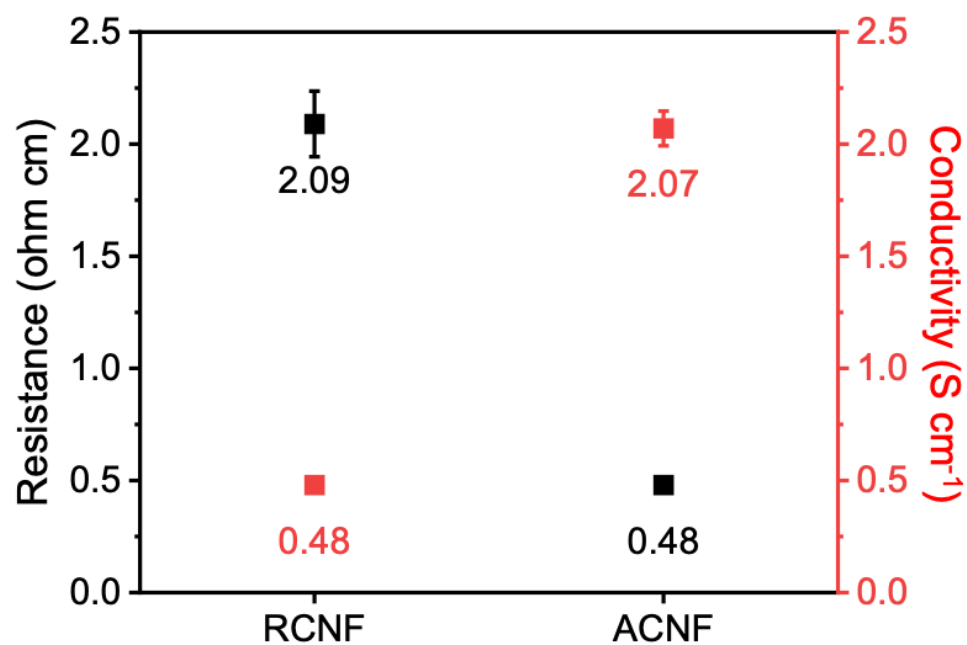

**Figure S8.** Electrical resistance and conductivity values of RCNFs and ACNFs investigated through a 4-point probe analysis.

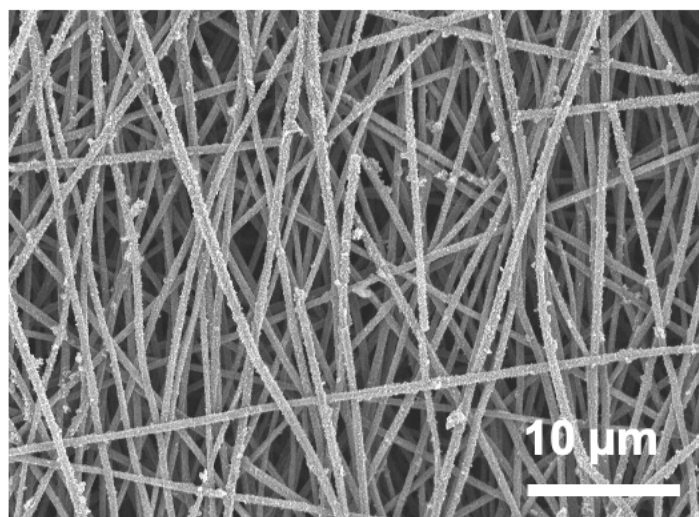

**Figure S9.** Low magnification SEM image of c-MOF/ACNF.

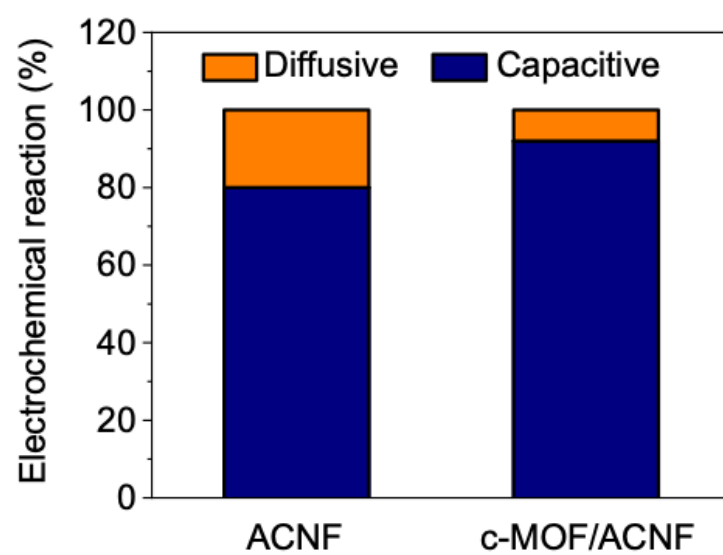

**Figure S10.** Deconvolution analysis of ACNF and c-MOF/ACNF.

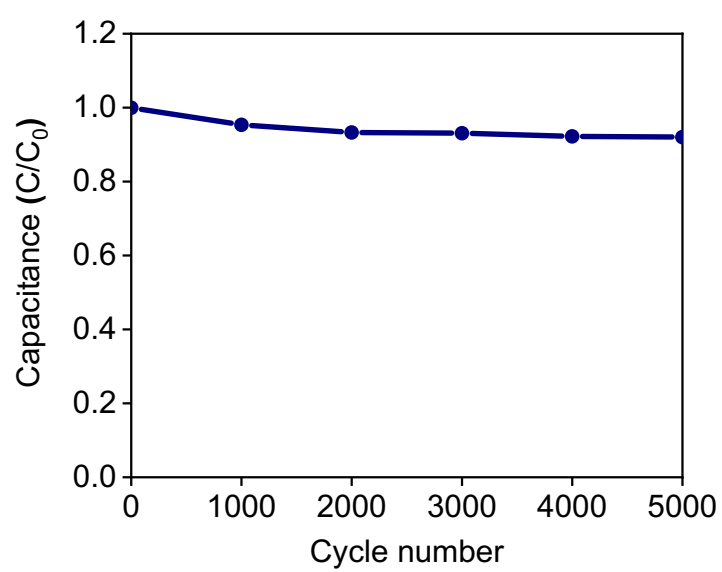

**Figure S11.** Cycling performance of c-MOF/ACNF electrode.

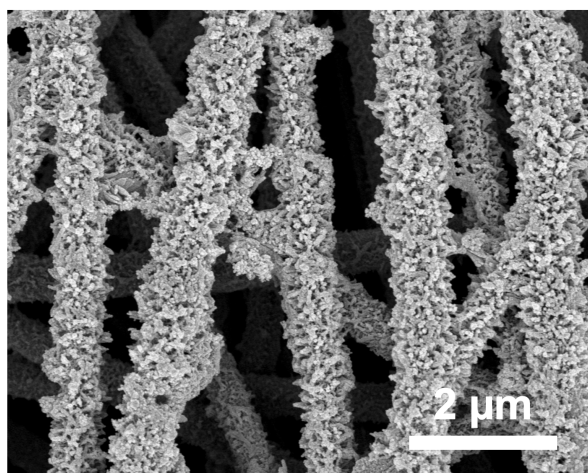

**Figure S12.** SEM images of c-MOF/ACNF after cycle test.
